# Supplementary material for: Targeting Thymidylate Synthase and tRNA-Derived Non-Coding RNAs Improves Therapeutic Sensitivity in Colorectal Cancer
Source: MDPI journal article supplement (doi:10.3390/antiox11112158), 2022-10-31
Supplement: s1 [file s1]

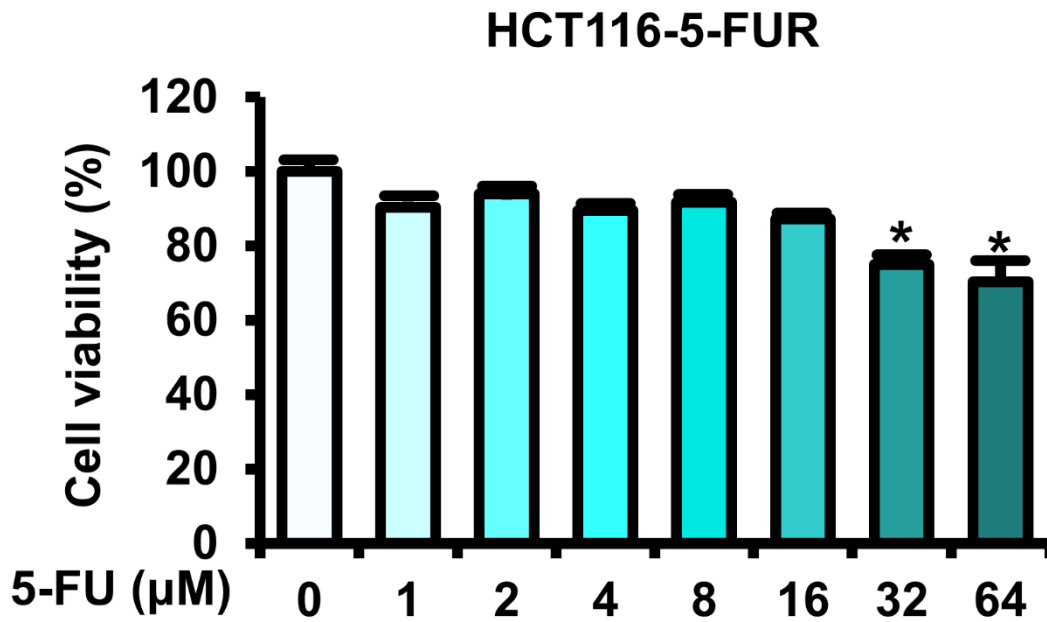

**Fig. S1.** Dose-dependent effects of 5-FU (0, 1, 2, 4, 8, 16, 32, and 64  $\mu\text{M}$ ) for 48 h on the viability of HCT116-5-FUR cells. Asterisks indicate statistically significant differences compared to untreated controls ( $*p < 0.05$ ).

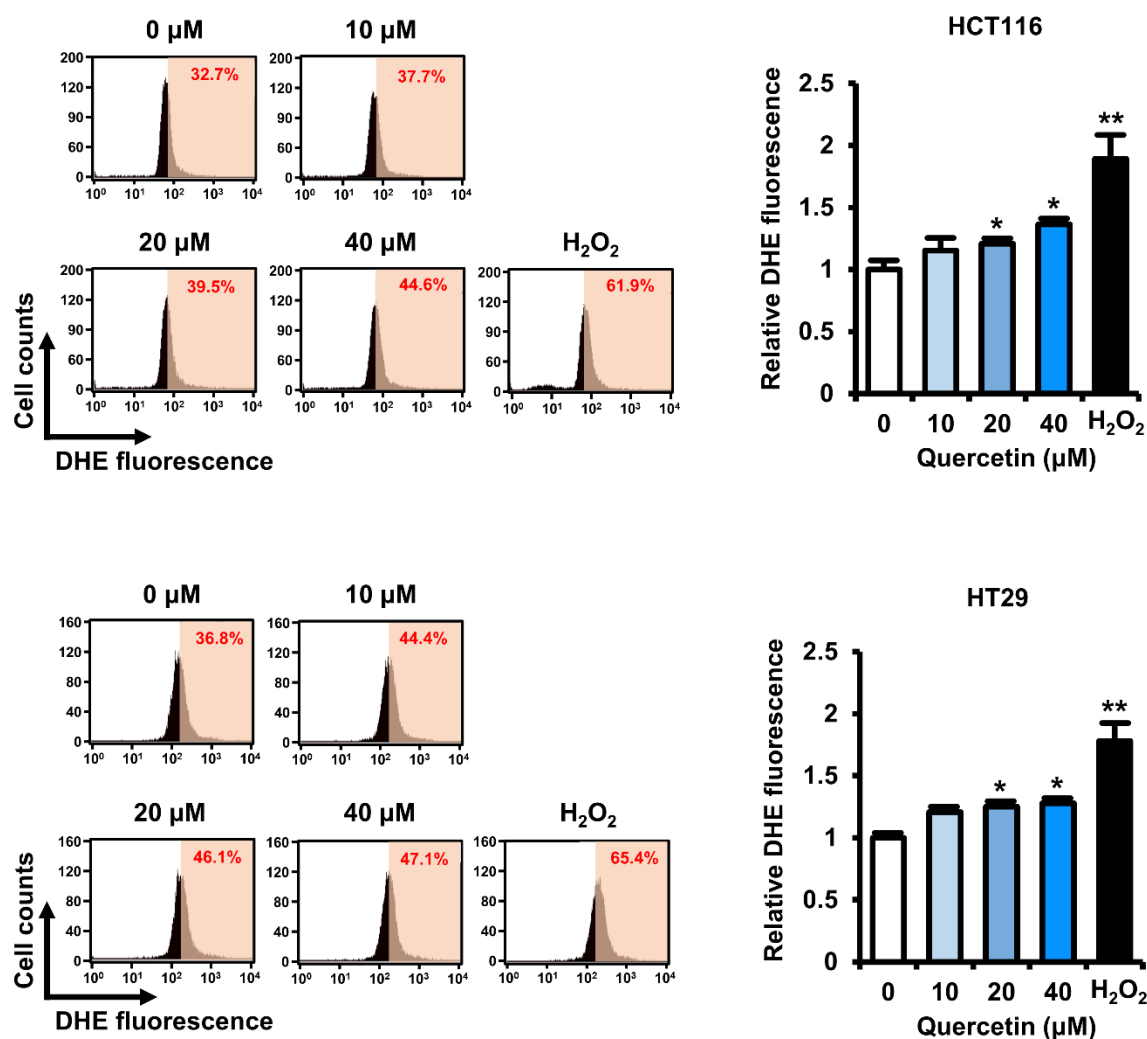

**Fig. S2.** Dose-dependent effects of quercetin (0, 10, 20, and 40  $\mu\text{M}$ ) for 1 h on superoxide production in HCT116 and HT29 cells. DHE fluorescence values were estimated by flow cytometry. Asterisks indicate statistically significant differences compared to untreated controls (\*\* $p < 0.01$ ; \* $p < 0.05$ ).

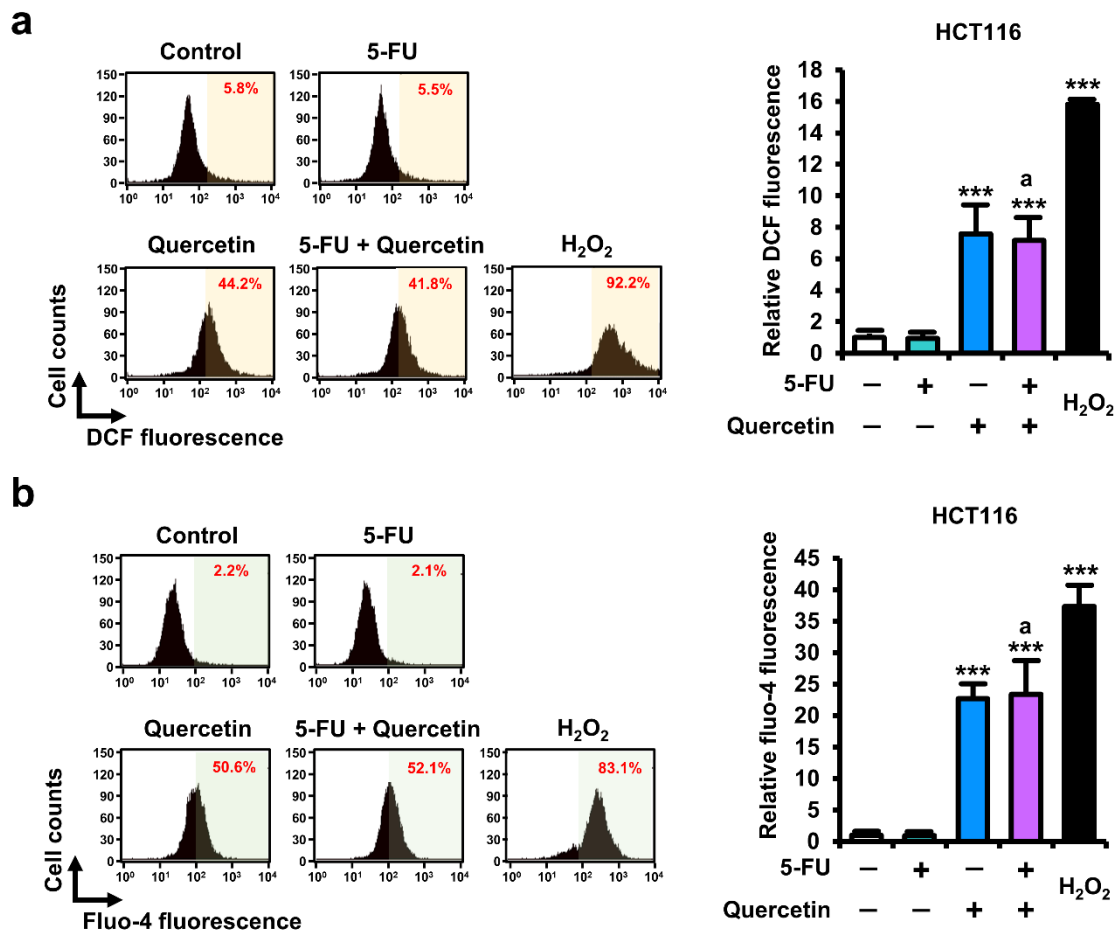

**Fig. S3.** Effects of 5-FU and quercetin on ROS production and intracellular Ca<sup>2+</sup> levels. (a) Effects of 5-FU (20  $\mu$ M) and quercetin (40  $\mu$ M) for 1 h on ROS production in HCT116 cells. DCF fluorescence values were estimated by flow cytometry. (b) Effects of 5-FU (20  $\mu$ M) and quercetin (40  $\mu$ M) for 1 h on intracellular Ca<sup>2+</sup> levels in HCT116 cells. Fluo-4 fluorescence values were estimated by flow cytometry. Asterisks indicate statistically significant differences compared to untreated controls (\*\*\*) ( $p < 0.001$ ). The symbol 'a' indicates a significant difference between combination treatment and 5-FU treatment alone ( $p < 0.05$ ).

**a**

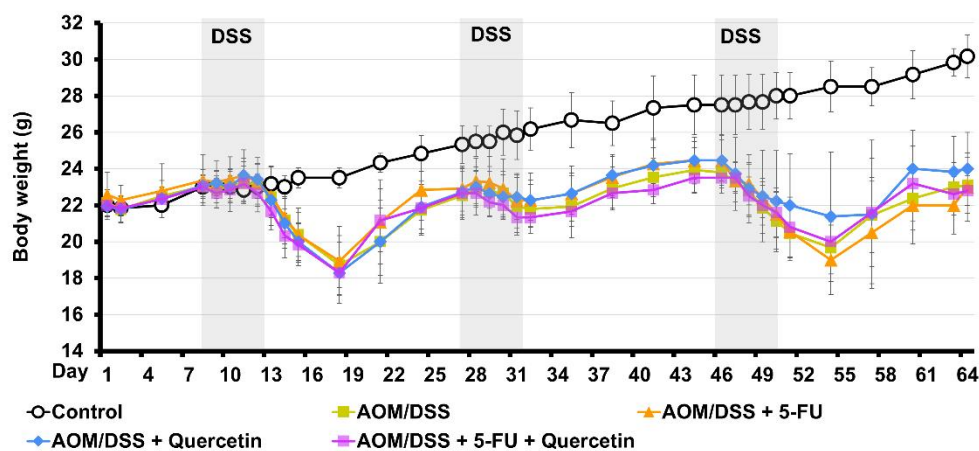

**b**

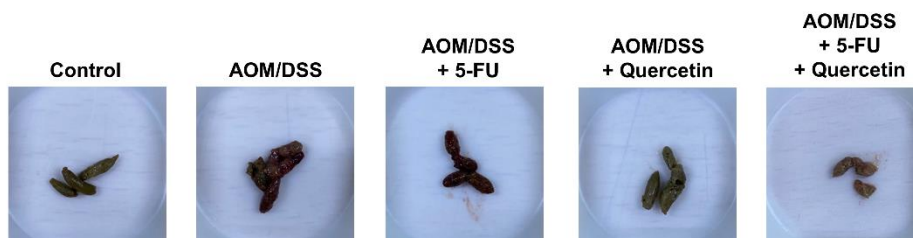

**Fig. S4.** Effects of 5-FU and quercetin on body weight and stool consistency in the colitis-associated CRC mice model. (a) Changes in body weight according to administration of 5-FU and quercetin in CRC mice. (b) Changes in stool consistency according to administration of 5-FU and quercetin in CRC mice.
